# Supplementary material for: Scale-free network reveals relations between quantum computing and Barrow entropy
Source: Research Square preprint supplement (doi:10.21203/rs.3.rs-2972786/v1), 2023-06-07
Supplement: Supplementary file 1 [file d9d9960413919d8deee366ea.docx]

Data Availability

[03/06/2023]

**M. Bousder and Z Sakhi**

Subject: Submission of Original Research Article:

**Scale-free network reveals relations between quantum computing and Barrow entropy**

Data Availability: The datasets generated and/or analyzed during the current study are not publicly available due to [reason why data are not public], but they can be obtained from the corresponding author upon reasonable request.
